# Supplementary material
Source: MDPI journal article supplement (https://www.mdpi.com/2073-4441/10/6/691)
Supplement: s1 [file s1]

| Beaver Creek Fall Parameters |                               |                 |             |                               |
|------------------------------|-------------------------------|-----------------|-------------|-------------------------------|
| Sub-basin                    | Parameter                     |                 | Value       | Units                         |
| Timberlost                   | Area                          |                 | 51.57       | (km <sup>2</sup> )            |
|                              | Simple Canopy                 | Initial Storage | 20          | %                             |
|                              |                               | Maximum Storage | 0.51        | cm                            |
|                              | Simple Surface                | Initial Storage | 90          | %                             |
|                              |                               | Maximum Storage | 0.51        | cm                            |
|                              | SCS Loss Method               | SCS Curve #     | 65          |                               |
|                              |                               | Impervious %    | 2           | %                             |
|                              | SCS Unit Hydrograph Transform | Lag Time        | 700         | Min                           |
| Ootka                        | Area                          |                 | 26.91       | (km <sup>2</sup> )            |
|                              | Simple Canopy                 | Initial Storage | 60          | %                             |
|                              |                               | Maximum Storage | 0.51        | cm                            |
|                              | Simple Surface                | Initial Storage | 25          | %                             |
|                              |                               | Maximum Storage | 2.54        | cm                            |
|                              | SCS Loss Method               | SCS Curve #     | 65          |                               |
|                              |                               | Impervious %    | 2           | %                             |
|                              | SCS Unit Hydrograph Transform | Lag Time        | 600         | Min                           |
| Beaver                       | Area                          |                 | 29.58       | (km <sup>2</sup> )            |
|                              | Simple Canopy                 | Initial Storage | 10          | %                             |
|                              |                               | Maximum Storage | 0.51        | cm                            |
|                              | Simple Surface                | Initial Storage | 40          | %                             |
|                              |                               | Maximum Storage | 2.54        | cm                            |
|                              | SCS Loss Method               | SCS Curve #     | 65          |                               |
|                              |                               | Impervious %    | 5           | %                             |
|                              | SCS Unit Hydrograph Transform | Lag Time        | 400         | Min                           |
| Beaver Creek                 | Area                          |                 | 68.48       | (km <sup>2</sup> )            |
|                              | Simple Canopy                 | Initial Storage | 10          | %                             |
|                              |                               | Maximum Storage | 1.02        | cm                            |
|                              | Simple Surface                | Initial Storage | 60          | %                             |
|                              |                               | Maximum Storage | 1.19        | cm                            |
|                              | SCS Loss Method               | SCS Curve #     | 65          |                               |
|                              |                               | Impervious %    | 12          | %                             |
|                              | SCS Unit Hydrograph Transform | Lag Time        | 3500        | Min                           |
| Basin Reaches                |                               |                 |             |                               |
| Reach Name                   | Length (m)                    | Slope           | Manning's N | Rectangular Channel Width (m) |
| Reach 1                      | 2847.44                       | 0.003           | 0.08        | 3.42                          |
| Reach 2                      | 14334.13                      | 0.0003          | 0.08        | 4.79                          |
| Reach 3                      | 854.66                        | 0.003           | 0.08        | 2.01                          |
| Reach 4                      | 3685.34                       | 0.003           | 0.08        | 1.69                          |
| Reach 5                      | 1385.32                       | 0.0041          | 0.076       | 3.37                          |
