# Supplementary material
Source: MDPI journal article supplement (https://www.mdpi.com/2073-4441/10/6/691)
Supplement: s1 [file s1]

| Ptarmigan Creek       |                               |                 |        |                    |
|-----------------------|-------------------------------|-----------------|--------|--------------------|
| Sub-basin             | Parameter                     |                 | Value  | Units              |
| Upper Ptarmigan Creek | Area                          |                 | 262.13 | (km <sup>2</sup> ) |
|                       | Simple Canopy                 | Initial Storage | 20     | %                  |
|                       |                               | Maximum Storage | 0.25   | cm                 |
|                       | Simple Surface                | Initial Storage | 90     | %                  |
|                       |                               | Maximum Storage | 0.76   | cm                 |
|                       | SCS Loss Method               | SCS Curve #     | 65     |                    |
|                       |                               | Impervious %    | 2      | %                  |
|                       | SCS Unit Hydrograph Transform | Lag Time        | 700    | Min                |
| Lower Ptarmigan Creek | Area                          |                 | 87.39  | (km <sup>2</sup> ) |
|                       | Simple Canopy                 | Initial Storage | 60     | %                  |
|                       |                               | Maximum Storage | 0.25   | cm                 |
|                       | Simple Surface                | Initial Storage | 25     | %                  |
|                       |                               | Maximum Storage | 2.54   | cm                 |
|                       | SCS Loss Method               | SCS Curve #     | 65     |                    |
|                       |                               | Impervious %    | 2      | %                  |
|                       | SCS Unit Hydrograph Transform | Lag Time        | 600    | Min                |
