# Supplementary material
Source: MDPI journal article supplement (https://www.mdpi.com/2073-4441/10/6/691)
Supplement: s1 [file s1]

| Russian River Parameters |                               |                 |             |                               |
|--------------------------|-------------------------------|-----------------|-------------|-------------------------------|
| Sub-basin                | Parameter                     |                 | Value       | Units                         |
| Upper Russian            | Area                          |                 | 499.76      | (km <sup>2</sup> )            |
|                          | Simple Canopy                 | Initial Storage | 20          | %                             |
|                          |                               | Maximum Storage | 2.03        | cm                            |
|                          | Simple Surface                | Initial Storage | 90          | %                             |
|                          |                               | Maximum Storage | 2.29        | cm                            |
|                          | SCS Loss Method               | SCS Curve #     | 65          |                               |
|                          |                               | Impervious %    | 2           | %                             |
|                          | SCS Unit Hydrograph Transform | Lag Time        | 700         | Min                           |
| Lower Russian            | Area                          |                 | 166.59      | (km <sup>2</sup> )            |
|                          | Simple Canopy                 | Initial Storage | 60          | %                             |
|                          |                               | Maximum Storage | 0.99        | cm                            |
|                          | Simple Surface                | Initial Storage | 25          | %                             |
|                          |                               | Maximum Storage | 2.54        | cm                            |
|                          | SCS Loss Method               | SCS Curve #     | 65          |                               |
|                          |                               | Impervious %    | 2           | %                             |
|                          | SCS Unit Hydrograph Transform | Lag Time        | 600         | Min                           |
| Basin Reaches            |                               |                 |             |                               |
| Reach Name               | Length (m)                    | Slope           | Manning's N | Rectangular Channel Width (m) |
| Upper Russian            | 13679.42                      | 0.004           | 0.025       | 13.72                         |
